# ***Toxoplasma gondii* importin $\alpha$ shows weak auto-inhibition**

Manasi Bhambid<sup>1\*</sup>, Vishakha Dey<sup>1,2\*</sup>, Sujata Walunj<sup>3</sup> and Swati Patankar<sup>1#</sup>

1: Department of Biosciences & Bioengineering, Indian Institute of Technology Bombay, Mumbai, India

2: Present address: Indiana University School of Medicine, Indianapolis, USA

3: Department of Biosciences & Bioengineering, Indian Institute of Technology Bombay, Mumbai, India; Department of Biochemistry & Molecular Biology, Monash University, Clayton, Australia; IITB-Monash Research Academy, IIT Bombay, Mumbai, India

\* Equal contribution

# Corresponding author: [patankar@iitb.ac.in](mailto:patankar@iitb.ac.in)

## **ABSTRACT**

Importin  $\alpha$  is a nuclear transporter that binds to nuclear localization signals (NLSs), consisting of 7-20 positively charged amino acids found within cargo proteins. In addition to cargo binding, intramolecular interactions also occur within the importin  $\alpha$  protein due to binding between the importin  $\beta$ -binding (IBB) domain and the NLS-binding sites, a phenomenon called auto-inhibition. The interactions causing auto-inhibition are driven by a stretch of basic residues, similar to an NLS, in the IBB domain. Consistent with this, importin  $\alpha$  proteins that do not have some of these basic residues lack auto-inhibition; a naturally occurring example of such a protein is found in the apicomplexan parasite *Plasmodium falciparum*. In this report, we show that importin  $\alpha$  from another apicomplexan parasite, *Toxoplasma gondii*, harbors basic residues (KKR) in the IBB domain and exhibits auto-inhibition. This protein has a long, unstructured hinge motif (between the IBB domain and the NLS-binding sites) that does not contribute to auto-inhibition. However, the IBB domain may have a higher propensity to form an  $\alpha$ -helical structure, positioning the wild-type KKR motif in an orientation that results in weaker interactions with the NLS-binding site than a KRR mutant. We conclude that the importin  $\alpha$  protein from *T. gondii* shows auto-inhibition, exhibiting a different phenotype from that of *P. falciparum* importin  $\alpha$ . However, our data indicate that *T. gondii* importin  $\alpha$  may have a low strength of auto-inhibition. We hypothesize that low levels of auto-inhibition may confer an advantage to these important human pathogens.

**KEYWORDS:** *Toxoplasma gondii*, nuclear import pathway, importin  $\alpha$ , auto-inhibition, IBB domain, hinge

## **INTRODUCTION**

Eukaryotic cells are defined by nuclear and cytoplasmic compartments separated by the nuclear envelope. Due to this compartmentalization, the transport of nuclear proteins occurs through nuclear pore complexes (NPCs) that perforate the nuclear envelope (Bonner, 1975; Feldherr et al., 1983). Nuclear proteins bear nuclear localization signals (NLSs) and are actively transported by carrier proteins, importin  $\alpha$  and importin  $\beta$  (Adam

et al., 1990; Cassany & Gerace, 2009; Dingwall & Laskey, 1991). Importin  $\alpha$  recognizes classical NLSs, characterized by clusters of basic amino acids, while importin  $\beta$  facilitates the passage of the importin  $\alpha$ :cargo complex by interactions with the NPC (Conti et al., 1998; Görlich et al., 1995).

The importin  $\alpha$  structure consists of NLS-binding sites within a tandem series of Armadillo (ARM) repeats and an N-terminal importin  $\beta$ -binding (IBB) domain (Görlich et al., 1996; Conti et al., 1998). The structurally polymorphic IBB domain mimics positively charged NLS sequences (Fanara et al., 2000; Jibiki et al., 2021; Lott & Cingolani, 2011) and binds to the ARM repeats of importin  $\alpha$ , thereby blocking the NLS-binding sites, a phenomenon called auto-inhibition. Auto-inhibition has been mapped to the third of the three basic amino acid clusters in the IBB domain (Harreman et al., 2003; Kobe, 1999). The IBB domain binds to importin  $\beta$ , revealing the NLS-binding sites and relieving auto-inhibition. Between the IBB domain and the ARM repeats lies a hinge motif that provides flexibility for these auto-inhibitory interactions (Kobe, 1999; Sankhala et al., 2017).

Importin  $\alpha$  proteins have been studied extensively (Chang et al., 2012; Dey & Patankar, 2018; Harreman et al., 2003; Hu et al., 2005; Hu & Jans, 1999; Hübner et al., 1999; Kobe, 1999; Miyatake et al., 2015; Pumroy et al., 2015; Pumroy & Cingolani, 2015); however, the extent of auto-inhibition of different importin  $\alpha$  proteins has not yet been comprehensively compared. Interestingly, full-length *Plasmodium falciparum* importin  $\alpha$  (PfImp $\alpha$ ) lacks auto-inhibition (Dey & Patankar, 2018), while the full-length importin  $\alpha$  of *Toxoplasma gondii* (TgImp $\alpha$ ), an apicomplexan parasite like *P. falciparum*, was shown to bind to the NLS of the *T. gondii* histone acetyltransferase, general control non-derepressible 5a (GCN5a), qualitatively suggesting a lack of auto-inhibition (Bhatti & Sullivan, 2005).

In this report, we quantitatively assess and demonstrate that the *T. gondii* importin  $\alpha$  protein exhibits auto-inhibition. We systematically test *in vitro* the NLS-binding affinity of mutants in the third basic cluster in TgImp $\alpha$ . Using *in silico* approaches, we predict the structure of native and mutant TgImp $\alpha$  proteins and propose that the helicity of the TgImp $\alpha$  IBB domain may result in weak interactions with the NLS-binding sites. Furthermore, we observe a longer hinge motif in importin  $\alpha$  of *T. gondii* and other apicomplexans and test its role in auto-inhibition. This report establishes that, unlike *P. falciparum*, *T. gondii* has an importin  $\alpha$  protein that shows auto-inhibition; however, our data indicate that the strength of auto-inhibition may be weak. Hence, importin  $\alpha$  proteins from two apicomplexan parasites appear to have evolved towards low levels of auto-inhibition, and we suggest that this phenotype may have a role in the biology of these human pathogens.

## **EXPERIMENTAL PROCEDURES**

### **Cloning of expression constructs**

Wild-type TgImp $\alpha$  and TgImp $\alpha$  lacking the IBB domain in pET28a

TgImp $\alpha$  (ToxoDB ID: TGGT1\_252290) was cloned into the pET28a vector using the NcoI and HindIII sites to generate a fusion with the C-terminal His-tag. All primers in this study were obtained from Sigma-Aldrich, and the restriction sites are underlined. First, cDNA was synthesized using the gene-specific reverse primer. Next, the same reverse primer was used with the forward primer to amplify the 1.64 kb TgImp $\alpha$  gene. The first 92 amino acids from the N-terminus of the TgImp $\alpha$  gene were found to be the IBB domain and hinge of the protein by Pfam analysis (<http://pfam.xfam.org/>) (Mistry et al., 2021). For generating  $\Delta$ IBB-TgImp $\alpha$  fused with a His-tag at the C-terminus, DNA corresponding to amino acids 92-545 of the gene was sub-cloned from this plasmid into pET28a between the NcoI and HindIII sites using the respective forward primer and the same reverse primer. The inserts were confirmed to be free of mutations by Sanger sequencing.

Wild-type (forward primer):

5' CATGCCATGGAGCGCAAGTTGGCCGATC 3'

$\Delta$ IBB (forward primer):

5' AATACCATGGGCCTCTCCAGCGGAGATCCG 3'

Reverse primer:

5' TCCCAAGCTTCTGGCCGAAGTTGAAGCCTC 3'

#### TgImp $\alpha$ third basic residue cluster mutants

The KKR motif was mutated into SKR, KRR and AAA by site-directed mutagenesis. The PCR products were amplified with a forward primer designed to carry the desired mutation (underlined) and a common reverse primer using WT-TgImp $\alpha$  with the C-terminal His-tag template. The mutations were confirmed by Sanger sequencing.

KKR/SKR (Forward primer):

5' CAGAACTTGGCATCGAAGCGCGCGGAGGCGCTG 3'

KKR/KRR (Forward primer):

5' CAGAACTTGGCAAAGCGCCGCGCGGAGGCGCTG 3'

KKR/AAA (Forward primer):

5' CAGAACTTGGCAGCTGCTGCTGCGGAGGCGCTG 3'

Reverse primer:

5' CTCGCGGTGCGTCTTGCGAATCTGCAGCTGCAG 3'

#### TgImp $\alpha$ chimera containing the hinge motif from MmImp $\alpha$ 2

The hinge motif in TgImp $\alpha$  (amino acids 49-78) was substituted with amino acids 57-70 of the hinge motif from MmImp $\alpha$ 2 (Uniprot ID: P52293). This construct (MmHinge-TgImp $\alpha$ ) was generated using primers with a sequence coding for the MmImp $\alpha$ 2 hinge (underlined) and sequence overlap with the TgImp $\alpha$  gene. WT-

TgImp $\alpha$  in the pET28a vector with the C-terminal His-tag template was used. The sequence of the chimera was confirmed by Sanger sequencing.

MmHinge (Forward primer):

5' CTACAGGAAAACCGGAACAACAACGTCTTCAGCTTCGAACATC 3'

MmHinge (Reverse primer):

5' CGGAGAAGTAGCATCATCAGGGTCCAGCGCCTCCGC 3'

## **Binding assays to study importin $\alpha$ :NLS interaction**

### Gel-based binding with Ni-NTA beads

Freshly purified WT-TgImp $\alpha$  and  $\Delta$ IBB-TgImp $\alpha$  proteins were used as bait, while the NLS from the *P. falciparum* trimethyl guanosine synthase 1 (PfTGS1) protein was used as prey. Thrombin treatment was used to remove the His-tag from the His-tag fused PfTGS1-NLS-GFP and GFP as described previously (Babar et al., 2016). Equimolar concentrations of WT-TgImp $\alpha$  and  $\Delta$ IBB-TgImp $\alpha$  (bait) proteins (2.5  $\mu$ M) were incubated separately with His-tag-free PfTGS1-NLS-GFP and GFP (prey) proteins (5  $\mu$ M). The reactions were carried out using bait bound to Ni-NTA beads as described previously (Dey & Patankar, 2018) to pull down the prey protein. The beads were then washed and added to SDS-PAGE gel loading dye to prepare samples before running on 15% SDS-PAGE gel. The gels were stained with Coomassie Blue to visualize the bands using standard protocols. The experiment was repeated twice. The intensity of the PfTGS1-NLS-GFP bands was quantified using the Gel Analysis method in ImageJ software (Schneider et al., 2012; Stael et al., 2022). The relative intensity is a ratio of the % intensity of the PfTGS1-NLS-GFP band pulled down by  $\Delta$ IBB-TgImp $\alpha$  compared to that pulled down by WT-TgImp $\alpha$ .

### Surface Plasmon Resonance (SPR)

The SPR assay was performed using the T200 BIAcore instrument described previously (Dey & Patankar, 2018). Due to the stability of the analytes and ligands, they were either freshly prepared or stored at -80°C. Analytes (WT-TgImp $\alpha$  and mutants) were prepared at the concentration range by a series of 2-fold dilutions and were allowed to interact with the immobilized ligands (PfTGS1-NLS-GFP and GFP) on a CM5 sensor chip. The binding was calculated after blank subtraction from ligand-coated chips interacting with GFP. The  $K_d$  was determined by fitting the sensorgrams in a global 1:1 Langmuirien interaction model, using BIA evaluation software 1.0 (GE Healthcare) and plotted in GraphPad Prism 9.0.2. All kinetic assays were performed three times.

### AlphaScreen

The AlphaScreen binding assay was performed as described previously (Fraser et al., 2014; Thomas et al., 2018; Wagstaff et al., 2011) to study interactions between TgImp $\alpha$  (with or without *M. musculus* importin  $\beta$ 1) with SV40 T-ag-NLS-GFP (Walunj et al., 2022). The previously published plasmid expressing WT-TgImp $\alpha$  with a C-terminal Transferase (GST) tag was used for the assay (Walunj et al., 2022). The SV40 T-ag-NLS-GFP and MmImp $\beta$ 1 plasmids were the same as those published previously (Wagstaff et al., 2012; Wagstaff & Jans, 2006). GST-tagged TgImp $\alpha$  and MmImp $\beta$ 1 were pre-dimerized as previously described (Wagstaff et al., 2012). For the binding assay (performed at room temperature), 30 nM final concentration of SV40-NLS-GFP-His was added to each well, followed by the addition of TgImp $\alpha$  or pre-dimerized TgImp $\alpha$ /MmImp $\beta$ 1 (0-15 nM final concentration range) and incubation for 30 minutes. Then, 4  $\mu$ L of the acceptor beads (Perkin Elmer) diluted in PBS was added to each well in the dark and incubated for 90 mins. Next, 4  $\mu$ L of the donor beads (Perkin Elmer) diluted in PBS was added to each well to give a total volume of 25  $\mu$ L and incubated for 2 hours. The AlphaScreen signal was quantified on a Perkin Elmer plate reader, and titration curves (sigmoidal fit) were plotted using GraphPad Prism 9.0.2 (San Diego, California, USA) as previously mentioned (Walunj et al., 2022). The hooking zone values were excluded, reflecting the signal's quenching due to the oversaturation of one of the beads' binding partners (Wagstaff et al., 2012).

### Structure prediction and docking

*Ab initio* structures of the full-length TgImp $\alpha$  (Uniprot ID: A0A125YID0), the TgIBB domain (amino acids 1-49) and TgARM repeats with the hinge (amino acids 50-545) and the full-length MmImp $\alpha$ 2 (Uniprot ID: P52293) were generated using the RaptorX Contact Prediction Server (<http://raptorx.uchicago.edu/>) (Källberg et al., 2012). The predicted models were corroborated in the Robetta structure prediction program (<https://rosetta.bakerlab.org/>) and the AlphaFold protein structure database (<https://alphafold.ebi.ac.uk/>) (Baek et al., 2021; Jumper et al., 2021; Varadi et al., 2022). The stereochemical quality of the predicted models from RaptorX (with the best RMSD value) was checked on the PROCHECK server (<https://saves.mbi.ucla.edu/>) (R. A. Laskowski et al., 1993; Roman A. Laskowski et al., 1996). The helical content of the predicted structures was determined in the Agadir program (<http://agadir.crg.es/protected/academic/calculation.jsp>) (Lacroix et al., 1998; Muñoz & Serrano, 1994, 1995a, 1995b, 1997).

The predicted IBB domain structure and ARM repeat structure were docked in the HADDOCK 2.4 docking server (<https://wenmr.science.uu.nl/haddock2.4/>) (Honorato et al., 2021; van Zundert et al., 2016; Wassenaar et al., 2012). The residues directly involved in the interaction (as observed in MmImp $\alpha$ 2; PDB ID: 1IAL) (Kobe, 1999) were selected for docking in models of TgImp $\alpha$  in the program. The cluster with the lowest Haddock score and RMSD from the overall lowest-energy structure was studied (van Zundert et al., 2016).

### Evolutionary analyses

The evolutionary relatedness between importin  $\alpha$  proteins was studied by analyzing the homologs of TgImp $\alpha$  in the plants, animals, fungi, algae, dinoflagellates and alveolates groups. Importin  $\alpha$  sequences were selected from the Uniprot database based on nomenclature and the Pfam database based on their domains (ARM, ARM3 and IBB) similar to TgImp $\alpha$ . The dataset includes all importin  $\alpha$  proteins from Alveolata groups (Apicomplexa, Perkinsozoa, dinoflagellate, Colpodellida and Ciliata) and some representative genera from the alga, plant, animal and fungi groups. The amino acid sequence of full-length importin  $\alpha$  from these organisms was then aligned using the Multiple Sequence Comparison by Log-expectation (MUSCLE) algorithm (Kumar et al., 2018). Sequences that did not align (all dinoflagellates importin  $\alpha$  and some sequences from other groups) were discarded. In the multiple Sequence Alignment (MSA) of the 73 proteins, the number of residues in the hinge motif and the proline-glycine amino acids was counted manually. The graphs were plotted using GraphPad Prism 9.0.2 (San Diego, California, USA).

The evolutionary history was inferred using the Maximum Likelihood method and Le\_Gascuel\_2008 (LG) + Gamma distribution (G) model (Le & Gascuel, 2008). The bootstrap consensus tree inferred from 500 replicates was taken to represent the evolutionary history of the taxa analyzed (Felsenstein, 1985). The percentage of replicate trees in which the associated taxa clustered together in the bootstrap test (500 replicates) are shown next to the branches (Felsenstein, 1985). Neighbor-Join and BioNJ algorithms were applied automatically to obtain the Initial tree(s) for the heuristic search. The matrix of pairwise distances was estimated using the JTT model and then selecting the topology with a superior log-likelihood value.

## **RESULTS**

### **Wild-type *Toxoplasma gondii* importin $\alpha$ demonstrates auto-inhibition**

*P. falciparum* importin  $\alpha$  shows a lack of auto-inhibition, conferred by a serine residue in the third basic cluster present in the IBB domain (Dey & Patankar, 2018). *T. gondii* is an apicomplexan parasite with a single gene of importin  $\alpha$  similar to *P. falciparum*, and the protein encoded by this gene has a KKR motif in the third basic residue cluster. We asked whether TgImp $\alpha$  would show a lack of auto-inhibition, as previously suggested (Bhatti & Sullivan, 2005). To establish the presence or absence of auto-inhibition, it is essential to compare the NLS-binding affinity *in vitro* of (1) a full-length protein to (2) the same protein that lacks auto-inhibition (by either deleting the IBB domain or by including importin  $\beta$  in the reaction). A comparison of the  $K_d$  values of these two conditions gives a fold-change value that serves as a quantitative value for auto-inhibition.

A hexapeptide consisting of amino acids 94-99 of TgGCN5a (TGGT1\_254555) was functional as a mono-partite NLS *in vivo* (Bhatti & Sullivan, 2005). We attempted to test the binding of TgImp $\alpha$  to this hexapeptide fused to GFP using Ni-NTA agarose beads and found a very faint band resulting from the binding interactions (data not shown). Additionally, in the AlphaScreen assay, the binding affinity of the TgGCN5a-NLS was only marginally higher than that of the negative control (data not shown). Therefore, a strong, bi-partite NLS found

in *P. falciparum* trimethyl guanosine synthase 1 (PFTGS1) was used for further experiments. Although derived from a *P. falciparum* protein, this NLS (PFTGS1-NLS) was chosen as it allowed a direct comparison to the strength of auto-inhibition of PfImp $\alpha$  (Dey & Patankar, 2018). Using this NLS, gel-based binding assays were performed to compare the binding affinities of TgImp $\alpha$  and  $\Delta$ IBB-TgImp $\alpha$  (Figure 1A).

Both WT-TgImp $\alpha$  and  $\Delta$ IBB-TgImp $\alpha$  bound to PFTGS1-NLS-GFP. The intensity of the band corresponding to His-tag free PFTGS1-NLS-GFP (Figure 1B) pulled down by  $\Delta$ IBB-TgImp $\alpha$  was higher than WT-TgImp $\alpha$  (Figure 1C; indicated by the red arrowhead) by a value of  $4.6 \pm 1.9$  for the replicates. The binding of His-tag-free PFTGS1-NLS-GFP is specific since neither of the bait proteins showed binding to GFP (Figure 1C). These results show that TgImp $\alpha$  exhibits auto-inhibition.

Next, SPR kinetic analysis was performed to identify the difference between the binding affinities of WT-TgImp $\alpha$  (Figure 2A) and  $\Delta$ IBB-TgImp $\alpha$  (Figure 2B) with PFTGS1-NLS-GFP. A  $K_d$  of  $0.83 \pm 0.04$   $\mu$ M was obtained for WT-TgImp $\alpha$  and  $0.24 \pm 0.03$   $\mu$ M for  $\Delta$ IBB-TgImp $\alpha$ , while the negative control (GFP) showed no binding. Consistent with the gel-based binding assays (Figure 1C), quantitative data indicated that  $\Delta$ IBB-TgImp $\alpha$  exhibits a 3.5-fold higher binding affinity when compared to WT-TgImp $\alpha$ , reconfirming that TgImp $\alpha$  exhibits auto-inhibition.

Auto-inhibition was also confirmed using a different approach, the AlphaScreen binding assay (Walunj et al., 2022). Here, a mono-partite NLS (SV40 T-ag-NLS-GFP) was chosen as this NLS has been used extensively (Wagstaff & Jans, 2006). Rather than using  $\Delta$ IBB-TgImp $\alpha$ , we used the full-length TgImp $\alpha$  protein and included MmImp $\beta$ 1, which we have shown binds to TgImp $\alpha$ . Perhaps due to the sensitivity of the AlphaScreen technology, a  $K_d$  of  $3.5 \pm 1$  nM was obtained for TgImp $\alpha$  alone (Figure 2C) and  $1.5 \pm 0.4$  nM in the presence of MmImp $\beta$ 1 (Figure 2D). This assay gave a fold-change value of 2.3-fold. Therefore, using three different assays, it can be concluded that TgImp $\alpha$  shows auto-inhibition.

### **TgImp $\alpha$ mutants indicate that the third basic residue cluster has a major contribution to auto-inhibition**

Multiple Sequence Alignment to compare the IBB domain of TgImp $\alpha$  with that of PfImp $\alpha$ , ScImp $\alpha$ , HsImp $\alpha$ 2, MmImp $\alpha$ 2, and AtImp $\alpha$ 1 showed that the third basic residue cluster of TgImp $\alpha$  has a KKR motif (Figure 3A). To assess whether the third basic residue cluster is solely responsible for the auto-inhibition of TgImp $\alpha$ , we generated three mutants (Figure 3B) where the wild-type KKR motif was replaced with (1) an AAA motif, as seen in the ScImp $\alpha$  mutant lacking auto-inhibition (Harreman et al., 2003), (2) a KRR motif, as seen in importin  $\alpha$  proteins that also exhibit auto-inhibition (Harreman et al., 2003; Hu et al., 2005; Hu & Jans, 1999; Hübner et al., 1999; Miyatake et al., 2015) and (3) an SKR motif, as seen in the wild-type PfImp $\alpha$  protein lacking auto-inhibition (Dey & Patankar, 2018).

Kinetic analysis was performed to determine the  $K_d$  of AAA-TgImp $\alpha$  (Figure 3C), KRR-TgImp $\alpha$  (Figure 3D), and SKR-TgImp $\alpha$  (Figure 3E) with PfTGS1-NLS-GFP. All the proteins gave  $K_d$  values in the low micromolar range, with AAA-TgImp $\alpha$  showing the highest binding affinity ( $0.28 \pm 0.03 \mu\text{M}$ ), followed by SKR-TgImp $\alpha$  ( $0.41 \pm 0.04 \mu\text{M}$ ) and then KRR-TgImp $\alpha$  ( $1.45 \pm 0.2 \mu\text{M}$ ). These data indicated that mutations in the third basic residue cluster of the TgImp $\alpha$  IBB domain alter the binding strength to the NLS. We next assessed the levels of auto-inhibition by calculating the fold-change of the  $K_d$  values of these proteins compared to that of  $\Delta\text{IBB-TgImp}\alpha$ , a protein that reflects no auto-inhibition. We also compared the fold-change values to PfImp $\alpha$  (Figure 4), where systematic mutations of the third basic cluster had been performed (Dey & Patankar, 2018). AAA-TgImp $\alpha$  showed a lack of auto-inhibition, as seen by a 1.2-fold increase in  $K_d$ , compared to  $\Delta\text{IBB-TgImp}\alpha$ . Consistent with our previous report, the SKR mutant of TgImp $\alpha$  also showed a lack of auto-inhibition like *P. falciparum* importin  $\alpha$  (a 1.7-fold increase compared to  $\Delta\text{IBB-TgImp}\alpha$ ) (Dey & Patankar, 2018). These data suggested that the third basic residue cluster plays a major role in the auto-inhibition of TgImp $\alpha$ .

Interestingly, the KRR-TgImp $\alpha$  mutant showed a fold-change value of 6.04 compared to a value of  $\sim 2$ -3 for the wild-type protein. These results indicate that the strength of auto-inhibition of the wild-type TgImp $\alpha$  protein, having a KKR motif, can be increased by mutation of a single lysine residue to generate a KRR motif and suggest that TgImp $\alpha$  may exhibit weak auto-inhibition. Additionally, comparing the KRR-TgImp $\alpha$  fold-change value (6.04-fold) to the fold-change value of the same mutation in PfImp $\alpha$  (13-fold) indicates that factors other than the third basic amino acid cluster appear responsible for tuning the strength of auto-inhibition in TgImp $\alpha$ .

### ***In silico* docking of the TgImp $\alpha$ IBB domain at the major NLS-binding site provides insights into the auto-inhibition strength**

In an attempt to understand the phenotype of auto-inhibition seen for TgImp $\alpha$ , we carried out *in silico* structural analyses of the interactions between the IBB domain and the ARM repeats. Indeed, in a structural study of MmImp $\alpha 2$  (PDB ID: 1IAL), intramolecular interactions were able to explain the auto-inhibition caused by the third basic residue cluster (KRR) (Kobe, 1999).

The predicted structure models of full-length TgImp $\alpha$  and MmImp $\alpha 2$  were initially compared. Their helical ARM repeats and NLS-binding sites were superimposed (Figure 5A), indicating that the prediction had resulted in a structure that could be used for further analyses. Notably, TgImp $\alpha$  harbors a longer hinge than MmImp $\alpha 2$ , and the TgIBB domain was predicted to have a helical structure (Figure 5A).

Next, residues 1-49 of the IBB domain of TgImp $\alpha$  (TgIBB) were modeled (estimated RMSD:  $2.37 \text{ \AA}$ ). Also, they showed a helical structure (Figure 5B) that was predicted to have a helical content of 20.41% predicted by the Agadir program. Similar results were seen using the Robetta software and in the AlphaFold database. In contrast, the MmImp $\alpha 2$  IBB domain shows a lower helical content (11.87%), and the third basic cluster



residues that form key contacts with the major NLS-binding site are in an unstructured motif (PDB ID:1IAL) (Kobe, 1999).

The prediction of a helical IBB domain and the longer hinge could potentially change the position and orientation of the third basic cluster, affecting the intramolecular interaction of TgIBB with the ARM repeats. In the docking of TgIBB and KRR-TgIBB (estimated RMSD: 2.04 Å) at the ARM repeats of  $\Delta$ IBB-TgImp $\alpha$  (estimated RMSD: 5.21 Å), differences in the orientation of the third basic residue cluster were observed (Figure 5B). Therefore, a detailed analysis of the interactions between the amino acid residues in the third basic residue cluster and the NLS-binding sites of the ARM repeats was performed.

The interaction between the third basic cluster, KRR, in the IBB domain of MmImp $\alpha$ 2 and the ARM repeats is stabilized by hydrogen bonds with the NLS-binding site and the crystal's water molecules (Kobe, 1999). These interacting residues and their polar bond distances are summarized in Table 1 to compare with the interactions observed in the predicted TgImp $\alpha$  models. In the docking analysis of the models, fewer interactions are observed between  $\Delta$ IBB-TgImp $\alpha$  and TgIBB than those seen for MmImp $\alpha$ 2 (Figure 5C). The summarised bond distances indicate that residues further away from the basic cluster also form interactions (Table 1). Compared to wild-type TgImp $\alpha$ , the KRR-TgImp $\alpha$  mutant demonstrates 1.7-fold stronger auto-inhibition, showing a stronger intramolecular interaction between the IBB domain and NLS-binding site. To validate this observation with the predicted model, we docked the  $\Delta$ IBB-TgImp $\alpha$  and the KRR-TgIBB mutant structures (Figure 5D) and first observed the wild-type and mutant IBB domains were superimposing at the third basic cluster (Figure 5B). Despite this, changing single lysine to arginine (KKR to KRR) resulted in numerous new interactions of the IBB domain with the ARM repeats. For example, R43 in KRR-TgIBB forms polar interactions with the second and fourth ARM repeats but is not seen in the wild-type TgIBB protein. The R42 residue of the KRR mutant forms a polar bond with N184 of the ARM repeat. Residues flanking the third basic residue cluster of the IBB domain (N38 and D48) also showed new interactions with the ARM repeats in the KRR mutant (Table 1). These results also reinforce the data (Figure 4), suggesting that the wild-type TgImp $\alpha$  protein, having a KKR motif, shows weak auto-inhibition.

### **The hinge motif in importin $\alpha$ proteins of Apicomplexa is longer than that of other phyla**

In the MSA of full-length importin  $\alpha$  proteins from different phyla (Figure 3A), we observed different hinge motif lengths and plotted the hinge length in 73 importin  $\alpha$  proteins from different organisms. Importin  $\alpha$  proteins from most of the phyla showed a mean length of the hinge motif in the range of 15-20 amino acids. Interestingly, the hinge in the apicomplexan importin  $\alpha$  proteins is almost twice as long as the hinge seen in other phyla, with a mean of >30 residues (Figure 6A). The length of the TgImp $\alpha$  hinge is 30 amino acids long, also observed in the predicted structure of full-length TgImp $\alpha$  (Figure 5A).

A report has suggested that the hinge provides flexibility to the *H. sapiens* importin  $\alpha 3$  protein (Sankhala et al., 2017). This leads to the speculation that in apicomplexans, a longer hinge might affect the orientation and positioning of the third basic cluster at the NLS-binding site interface. This could occur due to the flexibility of the hinge motif, a property that is influenced by the presence of amino acids disrupting the secondary structure, like proline and glycine. These amino acids are found at higher frequencies in the hinge motifs between two dynamic domains (Grummt, 1998; Veevers et al., 2020). Apicomplexan importin  $\alpha$  proteins showed a mean of 30% proline and glycine in their hinge motifs, higher than the other phyla studied here (Figure 6B). Notably, in TgImp $\alpha$ , proline and glycine make up 40% of the hinge (Figure 6B, highlighted in red), suggesting higher flexibility, possibly affecting the positioning of the third basic residue cluster described in the previous section.

In order to directly test whether the hinge motif of TgImp $\alpha$  has any role in modulating the strength of auto-inhibition, we performed SPR assays with WT-TgImp $\alpha$  and a chimeric protein (MmHinge-TgImp $\alpha$ ) containing a replacement of the TgImp $\alpha$  hinge (amino acids 49-78) with the MmImp $\alpha 2$  hinge (amino acids 57-70) (Figure 6C). Note that the hinge motif of MmImp $\alpha 2$  is smaller and contains only one proline and no glycine residues (Figure 3A). A  $K_d$  of  $3.26 \pm 0.22$  nM was obtained for WT-TgImp $\alpha$  (Figure 6D) and  $5.1 \pm 3.26$  nM for MmHinge-TgImp $\alpha$  (Figure 6E) with PfTGS1-NLS-GFP, while the negative control (GFP) showed no binding. Compared to WT-TgImp $\alpha$ , the MmHinge-TgImp $\alpha$  chimera does not demonstrate a significant increase in the  $K_d$ . These results indicate that the long, proline and glycine-rich hinge motif of TgImp $\alpha$  is not involved in auto-inhibition and may have alternate functions.

### **Quantitative analysis of auto-inhibition of importin $\alpha$ proteins from the literature**

In this report, the auto-inhibition strength is calculated as a fold-change value between the  $K_d$  of the wild-type protein and the protein lacking auto-inhibition. The fold-change value reflects the ability of the full-length importin  $\alpha$  protein to bind to the NLS and higher values indicate that the protein shows strong auto-inhibition. In contrast, a fold-change value of 1 indicates that the full-length importin  $\alpha$  protein binds with similar affinity to the NLS as the  $\Delta$ I $\beta$ B protein or an assay including importin  $\beta$ , suggesting a lack of auto-inhibition. We compiled published data to compare fold-change values of different importin  $\alpha$  proteins and assess whether the strength of auto-inhibition can be inferred from these data (Table 2).

Analysis of quantitative data from the literature (Table 2) shows that the  $K_d$  values can change depending on the assay and the NLS. Clearly, to compare  $K_d$  values and strength of auto-inhibition between different importin  $\alpha$  proteins, they must be assayed in the same experiment. However, these data also indicate that the fold-change values of importin  $\alpha$  proteins that show auto-inhibition is consistently greater than 1, regardless of the assay and the NLS being mono-partite or bi-partite, except for one study where the fold-change value for *S. cerevisiae* importin  $\alpha$  is unusually low (Hu & Jans, 1999). The results presented in this report, when set

against the compiled data from Table 2, reinforce the conclusion that *T. gondii* importin  $\alpha$  shows auto-inhibition, unlike *P. falciparum* importin  $\alpha$ , which shows a fold-change value of 1.09 and, therefore, a lack of auto-inhibition. *A. thaliana* importin  $\alpha 1$  has a fold-change value of 0.93, also showing a lack of auto-inhibition (Table 2). Interestingly, this protein has a KKR motif in the third basic residue cluster.

### **Apicomplexan importin $\alpha$ proteins are not evolutionarily related to those from plants**

Multiple lines of evidence show the inheritance of an extant non-photosynthetic plastid, the apicoplast, in apicomplexans from a common red algal endosymbiont (Janouskovec et al., 2010). Indeed, a minimal phylogenetic tree consisting of five importin  $\alpha$  proteins, PfImp $\alpha$ , TgImp $\alpha$ , AtImp $\alpha$ , ScImp $\alpha$  and HsImp $\alpha$ , showed that apicomplexan importin  $\alpha$  proteins are more similar to those found in plants (Bhatti & Sullivan, 2005). We asked whether an extensive phylogenetic analysis would also show that apicomplexan importin  $\alpha$  proteins had an evolutionary history that could be traced to the endosymbiont. If this were the case, the phylogenetic analysis would place the apicomplexan importin  $\alpha$  proteins closer to algae and plants.

Apicomplexans, dinoflagellates, colpodellids, ciliates and perkinsozoans are members of the Alveolata group (Van de Peer & De Wachter, 1997). The apicoplast in apicomplexans shares a common origin with the plastids of dinoflagellates and colpodellids, the closest algal relatives (Fast et al., 2001; Janouskovec et al., 2010, 2019). However, during our analysis, dinoflagellate importin  $\alpha$  amino acid sequences were highly divergent when aligned through the MUSCLE program and were removed. Among the 5 colpodellid importin  $\alpha$  proteins, only two *Vitrella brassicaformis* importin  $\alpha$  proteins aligned in MUSCLE and branch with the apicomplexan clade, indicated by a branch of Apicomplexa and Colpodellida in the tree (Figure 7, highlighted in blue).

The Apicomplexa group branched with the fungi and plant group and not animals. In our analysis, apicomplexan importin  $\alpha$  seems to be closely related to fungi and red algae (through the ancestral endosymbiont) and distantly to plants, a group containing *A. thaliana* (Figure 7, highlighted in green). Therefore, this extensive analysis with a diverse dataset does not indicate a close evolutionary relationship between apicomplexans (highlighted in blue and cyan) and plants (highlighted in green) (Figure 7). Despite PfImp $\alpha$  and AtImp $\alpha 1$  showing a lack of auto-inhibition, each protein may have acquired phenotype independently.

## **DISCUSSION**

### ***T. gondii* importin $\alpha$ shows auto-inhibition that may be weak compared to other organisms**

In contrast to *P. falciparum*, *T. gondii* importin  $\alpha$  demonstrates auto-inhibition; this was confirmed with different techniques, NLSs and approaches. We propose that this auto-inhibition may be weak compared to other organisms. When the strength of auto-inhibition of TgImp $\alpha$  is quantified by calculating the fold-change value of binding affinities between the full-length protein and the protein lacking auto-inhibition, this value is

~2-3 fold. Although it is tempting to suggest that this number is lower than the fold-change values seen for other importin  $\alpha$  proteins, we show in this report that rather than an intrinsic property of the protein, different NLSs and assays can give different fold-change values.

What, then, is the evidence for weak auto-inhibition? The strength of auto-inhibition of wild-type *T. gondii* importin  $\alpha$  can be increased almost 2-fold by a single amino acid mutation in the third basic cluster of the IBB domain. Although both motifs have basic amino acids, a KKR motif appears to result in weaker auto-inhibition than a KRR motif. Using *in silico* structural analyses of wild-type and the KRR mutant of TgImp $\alpha$ , we show that the interactions between key amino acid residues of the NLS-binding sites and the KKR motif are strengthened in the KRR mutant. The hydrogen bonding of certain residues is energetically favorable over others at the NLS-binding pocket resulting in strong interactions (Conti et al., 1998). Our *in silico* analysis suggests that the NLS-binding pocket in TgImp $\alpha$  could favor arginine over a lysine residue in this motif. Identifying a mutant that increases the auto-inhibition strength provides a tool for testing the role of auto-inhibition *in vivo*.

The strength of auto-inhibition could also depend on other features in the protein as observed by *in silico* prediction analysis, the structure of the IBB domain of *T. gondii* importin  $\alpha$  hints that this domain could be helical. The available forms of the IBB domain in complex with different importin proteins show helical structures in some cases and an unstructured domain in others, indicating structural polymorphism of the IBB domain (Cingolani et al., 1999, Matsuura & Stewart, 2004, Jibiki et al., 2021). Nevertheless, our structure prediction analyses indicate that in direct comparison to MmImp $\alpha$ 2, there appears to be a higher  $\alpha$ -helical content in the IBB domain of TgImp $\alpha$ . This structured IBB domain may play a role in the difference in the auto-inhibition strength between wild-type TgImp $\alpha$  and the KRR mutant.

Another interesting observation from the MSA was that the importin  $\alpha$  proteins of apicomplexans harbor a longer hinge, almost twice the length seen in other taxa and a high frequency of prolines and glycines that disrupt helical structures. Importin  $\alpha$  is a helix of helices with a strongly conserved rigid structure (Kobe, 1999; Pumroy et al., 2015; Sankhala et al., 2017). In such a rigid structure, the intramolecular interactions between the IBB and ARM domains are facilitated by the unstructured hinge motif that folds the IBB upon itself. However, our results show that the long hinge region of TgImp $\alpha$  does not play a role in the strength of auto-inhibition and could have other functions, such as interactions with regulatory proteins. Nevertheless, detailed structural studies of the apicomplexan importin  $\alpha$  proteins will shed light on the helical content of the TgImp $\alpha$  IBB domain and the length and composition of the hinge motif as a basis for the strength of auto-inhibition.

**Phylogenetic analysis of importin  $\alpha$  proteins reveals relationships between apicomplexans and single-celled eukaryotes**

It was noteworthy that a lack of auto-inhibition is seen in the importin  $\alpha$  proteins of *P. falciparum* and *A. thaliana* (Table 2) (Dey & Patankar, 2018; Hübner et al., 1999). These organisms share an evolutionary history as the extant non-photosynthetic plastid in apicomplexans may have been inherited from a common ancestor (Janouskovec et al., 2010). Previous work suggests that the importin  $\alpha$  proteins from plants and apicomplexans are close relatives (Bhatti & Sullivan, 2005). We performed a detailed study by including other importin  $\alpha$  homologs in our dataset. Interestingly, the phylogenetic tree with all phyla suggests a divergence between the plants and apicomplexans and a closer relation with red algae and fungi. We speculate that the same phenotype might have been acquired independently to suit each organism's requirements for nuclear transport.

The evolutionary analysis of importin  $\alpha$  proteins gave some novel insights. The branching of these proteins in Colpodellida and Perkinsozoa with Apicomplexa suggests a strong similarity. However, the ciliates branch at the bottom of the tree and diverges from all other alveolates. Our analysis of the three basic clusters in the IBB domain shows a lack of basic residue clusters in the IBB domain in ciliates (data not shown). The ciliates are known to have two nuclei (macronuclei and micronuclei) (Hausmann & Bradbury, 1996), and differential permeability regulates the nuclear import because of unique nucleoporins in their NPCs and importin  $\alpha$  proteins specific to a single nucleus (Malone et al., 2008). These unique features may underlie the high variability in their IBB domain.

## **Conclusions**

In summary, we demonstrate that the auto-inhibition strength of *Toxoplasma gondii* importin  $\alpha$  is conferred mainly by the third basic residue cluster in the IBB domain. We generate and characterize single amino acid mutants in the third basic residue cluster, resulting in a lack of or increased auto-inhibition strength. These mutants can be tested further using both structural and *in vivo* approaches to understand the role of auto-inhibition of *T. gondii* importin  $\alpha$  in the biology of this important human pathogenic parasite.

## **ACKNOWLEDGEMENTS**

SP acknowledges the Department of Science and Technology, Science and Engineering Research Board, India, for funding (CRG/2018/000129). PhD fellowships were given to MB, VD and SW by the Human Resource Development Group-Council of Scientific and Industrial Research, Department of Biotechnology-The World Academy of Sciences and Indian Institute of Technology Bombay-Monash Research Academy. We acknowledge the SPR central facility funded by Industrial Research and Consultancy Centre at IIT Bombay and FP7 WeNMR, H2020 West-Life, EOSC-hub and EGI-ACE European e-Infrastructure projects for the docking studies. We thank Kiran Kondabagil, IIT Bombay, and David Jans, Monash University, for their valuable feedback on the manuscript.

## **AUTHORS' CONTRIBUTION**

VD, SW, MB and SP conceived and designed the experiments. VD, SW and MB performed the *in vitro* experiments. MB and SP conceived and MB performed the *in silico* analysis. MB prepared the figures. MB and SP prepared the manuscript. MB, SP, VD and SW reviewed drafts of the manuscripts.

## **REFERENCES**

- Adam, S. A., Marr, R. S., & Gerace, L. (1990). Nuclear protein import in permeabilized mammalian cells requires soluble cytoplasmic factors. *The Journal of Cell Biology*, *111*(3), 807–816.
- Babar, P. H., Dey, V., Jaiswar, P., & Patankar, S. (2016). An insertion in the methyltransferase domain of *P. falciparum* trimethylguanosine synthase harbors a classical nuclear localization signal. *Molecular and Biochemical Parasitology*, *210*(1–2), 58–70.
- Baek, M., DiMaio, F., Anishchenko, I., Dauparas, J., Ovchinnikov, S., Lee, G. R., Wang, J., Cong, Q., Kinch, L. N., Schaeffer, R. D., Millán, C., Park, H., Adams, C., Glassman, C. R., DeGiovanni, A., Pereira, J. H., Rodrigues, A. V., van Dijk, A. A., Ebrecht, A. C., ... Baker, D. (2021). Accurate prediction of protein structures and interactions using a three-track neural network. *Science*, *373*(6557), 871–876.
- Bhatti, M. M., & Sullivan, W. J. (2005). Histone Acetylase GCN5 Enters the Nucleus via Importin- $\alpha$  in Protozoan Parasite *Toxoplasma gondii*. *Journal of Biological Chemistry*, *280*(7), 5902–5908.
- Bonner, W. M. (1975). Protein migration into nuclei. I. Frog oocyte nuclei in vivo accumulate microinjected histones, allow entry to small proteins, and exclude large proteins. *Journal of Cell Biology*, *64*(2), 421–430.
- Cassany, A., & Gerace, L. (2009). Reconstitution of nuclear import in permeabilized cells. *Methods in Molecular Biology (Clifton, N.J.)*, *464*, 181–205.
- Chang, C.-W., Couñago, R. L. M., Williams, S. J., Bodén, M., & Kobe, B. (2012). Crystal Structure of Rice Importin- $\alpha$  and Structural Basis of Its Interaction with Plant-Specific Nuclear Localization Signals[W]. *The Plant Cell*, *24*(12), 5074–5088.
- Conti, E., Uy, M., Leighton, L., Blobel, G., & Kuriyan, J. (1998). Crystallographic Analysis of the Recognition of a Nuclear Localization Signal by the Nuclear Import Factor Karyopherin  $\alpha$ . *Cell*, *94*(2), 193–204.
- Dey, V., & Patankar, S. (2018). Molecular basis for the lack of auto-inhibition of *Plasmodium falciparum* importin  $\alpha$ . *Biochemical and Biophysical Research Communications*, *503*(3), 1792–1797.
- Dingwall, C., & Laskey, R. A. (1991). Nuclear targeting sequences—A consensus? *Trends in Biochemical Sciences*, *16*(12), 478–481.

- Fahrenkrog, B., & Aebi, U. (2003). The nuclear pore complex: Nucleocytoplasmic transport and beyond. *Nature Reviews. Molecular Cell Biology*, 4(10), 757–766.
- Fanara, P., Hodel, M. R., Corbett, A. H., & Hodel, A. E. (2000). Quantitative Analysis of Nuclear Localization Signal (NLS)-Importin  $\alpha$  Interaction through Fluorescence Depolarization. *Journal of Biological Chemistry*, 275(28), 21218–21223.
- Fast, N. M., Kissinger, J. C., Roos, D. S., & Keeling, P. J. (2001). Nuclear-Encoded, Plastid-Targeted Genes Suggest a Single Common Origin for Apicomplexan and Dinoflagellate Plastids. *Molecular Biology and Evolution*, 18(3), 418–426.
- Feldherr, C. M., Cohen, R. J., & Ogburn, J. A. (1983). Evidence for mediated protein uptake by amphibian oocyte nuclei. *The Journal of Cell Biology*, 96(5), 1486–1490.
- Felsenstein, J. (1985). CONFIDENCE LIMITS ON PHYLOGENIES: AN APPROACH USING THE BOOTSTRAP. *Evolution*, 39(4), 783–791.
- Fraser, J. E., Rawlinson, S. M., Wang, C., Jans, D. A., & Wagstaff, K. M. (2014). Investigating Dengue Virus Nonstructural Protein 5 (NS5) Nuclear Import. In R. Padmanabhan & S. G. Vasudevan (Eds.), *Dengue* (Vol. 1138, pp. 301–328). Springer New York.
- Görlich, D., Henklein, P., Laskey, R. A., & Hartmann, E. (1996). A 41 amino acid motif in importin-alpha confers binding to importin-beta and hence transit into the nucleus. *The EMBO Journal*, 15(8), 1810–1817.
- Görlich, D., Vogel, F., Mills, A. D., Hartmann, E., & Laskey, R. A. (1995). Distinct functions for the two importin subunits in nuclear protein import. *Nature*, 377(6546), 246–248.
- Grummt, M. (1998). Importance of a flexible hinge near the motor domain in kinesin-driven motility. *The EMBO Journal*, 17(19), 5536–5542.
- Harreman, M. T., Hodel, M. R., Fanara, P., Hodel, A. E., & Corbett, A. H. (2003). The Auto-inhibitory Function of Importin  $\alpha$  Is Essential in Vivo. *Journal of Biological Chemistry*, 278(8), 5854–5863.
- Hausmann, K., & Bradbury, P. C. (1996). *Ciliates: Cells as organisms*. G. Fischer.
- Honorato, R. V., Koukos, P. I., Jiménez-García, B., Tsaregorodtsev, A., Verlato, M., Giachetti, A., Rosato, A., & Bonvin, A. M. J. J. (2021). Structural Biology in the Clouds: The WeNMR-EOSC Ecosystem. *Frontiers in Molecular Biosciences*, 8, 729513.
- Hu, W., & Jans, D. A. (1999). Efficiency of Importin  $\alpha/\beta$ -Mediated Nuclear Localization Sequence Recognition and Nuclear Import: DIFFERENTIAL ROLE OF NTF2\*. *Journal of Biological Chemistry*, 274(22), 15820–15827.

- Hu, W., Kemp, B. E., & Jans, D. A. (2005). Kinetic properties of nuclear transport conferred by the retinoblastoma (Rb) NLS. *Journal of Cellular Biochemistry*, 95(4), 782–793.
- Hübner, S., Smith, H. M. S., Hu, W., Chan, C. K., Rihs, H.-P., Paschal, B. M., Raikhel, N. V., & Jans, D. A. (1999). Plant Importin  $\alpha$  Binds Nuclear Localization Sequences with High Affinity and Can Mediate Nuclear Import Independent of Importin  $\beta$ . *Journal of Biological Chemistry*, 274(32), 22610–22617.
- Janouskovec, J., Horak, A., Obornik, M., Lukes, J., & Keeling, P. J. (2010). A common red algal origin of the apicomplexan, dinoflagellate, and heterokont plastids. *Proceedings of the National Academy of Sciences*, 107(24), 10949–10954.
- Janouskovec, J., Paskerova, G., Miroliubova, T., Mikhailov, K., Birley, T., Aleoshin, V., & Simdyanov, T. (2019). Apicomplexan-like parasites are polyphyletic and widely but selectively dependent on cryptic plastid organelles. *Evolutionary Biology Microbiology and Infectious Disease*.
- Jibiki, K., Liu, M., Lei, C., Kodama, T. S., Kojima, C., Fujiwara, T., & Yasuhara, N. (2021). Biochemical propensity mapping for structural and functional anatomy of importin  $\alpha$  IBB domain. *Genes to Cells*, gtc.12917.
- Jumper, J., Evans, R., Pritzel, A., Green, T., Figurnov, M., Ronneberger, O., Tunyasuvunakool, K., Bates, R., Židek, A., Potapenko, A., Bridgland, A., Meyer, C., Kohl, S. A. A., Ballard, A. J., Cowie, A., Romera-Paredes, B., Nikolov, S., Jain, R., Adler, J., ... Hassabis, D. (2021). Highly accurate protein structure prediction with AlphaFold. *Nature*, 596(7873), 583–589.
- Källberg, M., Wang, H., Wang, S., Peng, J., Wang, Z., Lu, H., & Xu, J. (2012). Template-based protein structure modeling using the RaptorX web server. *Nature Protocols*, 7(8), 1511–1522.
- Kobe, B. (1999). Autoinhibition by an internal nuclear localization signal revealed by the crystal structure of mammalian importin  $\alpha$ . *Nature Structural Biology*, 6(4), 388–397.
- Kumar, S., Stecher, G., Li, M., Knyaz, C., & Tamura, K. (2018). MEGA X: Molecular Evolutionary Genetics Analysis across Computing Platforms. *Molecular Biology and Evolution*, 35(6), 1547–1549.
- Lacroix, E., Viguera, A. R., & Serrano, L. (1998). Elucidating the folding problem of  $\alpha$ -helices: Local motifs, long-range electrostatics, ionic-strength dependence and prediction of NMR parameters 1 Edited by A. R. Fersht. *Journal of Molecular Biology*, 284(1), 173–191.
- Laskowski, R. A., MacArthur, M. W., Moss, D. S., & Thornton, J. M. (1993). PROCHECK: A program to check the stereochemical quality of protein structures. *Journal of Applied Crystallography*, 26(2), 283–291.



- Laskowski, Roman A., Rullmann, J. Antoon C., MacArthur, Malcolm W., Kaptein, R., & Thornton, Janet M. (1996). AQUA and PROCHECK-NMR: Programs for checking the quality of protein structures solved by NMR. *Journal of Biomolecular NMR*, 8(4).
- Le, S. Q., & Gascuel, O. (2008). An improved general amino acid replacement matrix. *Molecular Biology and Evolution*, 25(7), 1307–1320.
- Lott, K., & Cingolani, G. (2011). The importin  $\beta$  binding domain as a master regulator of nucleocytoplasmic transport. *Biochimica et Biophysica Acta (BBA) - Molecular Cell Research*, 1813(9), 1578–1592.
- Malone, C. D., Falkowska, K. A., Li, A. Y., Galanti, S. E., Kanuru, R. C., LaMont, E. G., Mazzarella, K. C., Micev, A. J., Osman, M. M., Piotrowski, N. K., Suszko, J. W., Timm, A. C., Xu, M.-M., Liu, L., & Chalker, D. L. (2008). Nucleus-Specific Importin Alpha Proteins and Nucleoporins Regulate Protein Import and Nuclear Division in the Binucleate *Tetrahymena thermophila*. *Eukaryotic Cell*, 7(9), 1487–1499.
- Mistry, J., Chuguransky, S., Williams, L., Qureshi, M., Salazar, G. A., Sonnhammer, E. L. L., Tosatto, S. C. E., Paladin, L., Raj, S., Richardson, L. J., Finn, R. D., & Bateman, A. (2021). Pfam: The protein families database in 2021. *Nucleic Acids Research*, 49(D1), D412–D419.
- Miyatake, H., Sanjoh, A., Unzai, S., Matsuda, G., Tatsumi, Y., Miyamoto, Y., Dohmae, N., & Aida, Y. (2015). Crystal Structure of Human Importin- $\alpha 1$  (Rch1), Revealing a Potential Autoinhibition Mode Involving Homodimerization. *PLOS ONE*, 10(2), e0115995.
- Muñoz, V., & Serrano, L. (1994). Elucidating the folding problem of helical peptides using empirical parameters. *Nature Structural & Molecular Biology*, 1(6), 399–409.
- Muñoz, V., & Serrano, L. (1995a). Elucidating the Folding Problem of Helical Peptides using Empirical Parameters. II†. Helix Macrodipole Effects and Rational Modification of the Helical Content of Natural Peptides. *Journal of Molecular Biology*, 245(3), 275–296.
- Muñoz, V., & Serrano, L. (1995b). Elucidating the Folding Problem of Helical Peptides using Empirical Parameters. III>Temperature and pH Dependence. *Journal of Molecular Biology*, 245(3), 297–308.
- Muñoz, V., & Serrano, L. (1997). Development of the multiple sequence approximation within the AGADIR model of  $\alpha$ -helix formation: Comparison with Zimm-Bragg and Lifson-Roig formalisms. *Biopolymers*, 41(5), 495–509.
- Pumroy, R. A., & Cingolani, G. (2015). Diversification of importin- $\alpha$  isoforms in cellular trafficking and disease states. *Biochemical Journal*, 466(1), 13–28.

- Pumroy, R. A., Ke, S., Hart, D. J., Zachariae, U., & Cingolani, G. (2015). Molecular Determinants for Nuclear Import of Influenza A PB2 by Importin  $\alpha$  Isoforms 3 and 7. *Structure*, *23*(2), 374–384.
- Sankhala, R. S., Lokareddy, R. K., Begum, S., Pumroy, R. A., Gillilan, R. E., & Cingolani, G. (2017). Three-dimensional context rather than NLS amino acid sequence determines importin  $\alpha$  subtype specificity for RCC1. *Nature Communications*, *8*(1), 979.
- Schneider, C. A., Rasband, W. S., & Eliceiri, K. W. (2012). NIH Image to ImageJ: 25 years of image analysis. *Nature Methods*, *9*(7), 671–675.
- Stael, S., Miller, L. P., Fernández-Fernández, Á. D., & Van Breusegem, F. (2022). Detection of Damage-Activated Metacaspase Activity by Western Blot in Plants. In M. Klemenčič, S. Stael, & P. F. Huesgen (Eds.), *Plant Proteases and Plant Cell Death* (Vol. 2447, pp. 127–137). Springer US.
- Thomas, D. R., Lundberg, L., Pinkham, C., Shechter, S., DeBono, A., Baell, J., Wagstaff, K. M., Hick, C. A., Kehn-Hall, K., & Jans, D. A. (2018). Identification of novel antivirals inhibiting recognition of Venezuelan equine encephalitis virus capsid protein by the Importin  $\alpha/\beta 1$  heterodimer through high-throughput screening. *Antiviral Research*, *151*, 8–19.
- Van de Peer, Y., & De Wachter, R. (1997). Evolutionary Relationships Among the Eukaryotic Crown Taxa Taking into Account Site-to-Site Rate Variation in 18S rRNA. *Journal of Molecular Evolution*, *45*(6), 619–630.
- van Zundert, G. C. P., Rodrigues, J. P. G. L. M., Trellet, M., Schmitz, C., Kastiris, P. L., Karaca, E., Melquiond, A. S. J., van Dijk, M., de Vries, S. J., & Bonvin, A. M. J. J. (2016). The HADDOCK2.2 Web Server: User-Friendly Integrative Modeling of Biomolecular Complexes. *Journal of Molecular Biology*, *428*(4), 720–725.
- Varadi, M., Anyango, S., Deshpande, M., Nair, S., Natassia, C., Yordanova, G., Yuan, D., Stroe, O., Wood, G., Laydon, A., Žídek, A., Green, T., Tunyasuvunakool, K., Petersen, S., Jumper, J., Clancy, E., Green, R., Vora, A., Lutfi, M., ... Velankar, S. (2022). AlphaFold Protein Structure Database: Massively expanding the structural coverage of protein-sequence space with high-accuracy models. *Nucleic Acids Research*, *50*(D1), D439–D444.
- Veevers, R., Cawley, G., & Hayward, S. (2020). Investigation of sequence features of hinge-bending regions in proteins with domain movements using kernel logistic regression. *BMC Bioinformatics*, *21*(1), 137.
- Wagstaff, K. M., & Jans, D. A. (2006). Intramolecular masking of nuclear localization signals: Analysis of importin binding using a novel AlphaScreen-based method. *Analytical Biochemistry*, *348*(1), 49–56.

- Wagstaff, K. M., Rawlinson, S. M., Hearps, A. C., & Jans, D. A. (2011). An AlphaScreen<sup>®</sup>-Based Assay for High-Throughput Screening for Specific Inhibitors of Nuclear Import. *Journal of Biomolecular Screening*, *16*(2), 192–200.
- Wagstaff, K. M., Sivakumaran, H., Heaton, S. M., Harrich, D., & Jans, D. A. (2012). Ivermectin is a specific inhibitor of importin  $\alpha/\beta$ -mediated nuclear import able to inhibit replication of HIV-1 and dengue virus. *Biochemical Journal*, *443*(3), 851–856.
- Walunj, S. B., Dias, M. M., Kaur, C., Wagstaff, K. M., Dey, V., Hick, C., Patankar, S., & Jans, D. A. (2022). High-Throughput Screening to Identify Inhibitors of *Plasmodium falciparum* Importin  $\alpha$ . *Cells*, *11*(7), 1201.
- Wassenaar, T. A., van Dijk, M., Loureiro-Ferreira, N., van der Schot, G., de Vries, S. J., Schmitz, C., van der Zwan, J., Boelens, R., Giachetti, A., Ferella, L., Rosato, A., Bertini, I., Herrmann, T., Jonker, H. R. A., Bagaria, A., Jaravine, V., Güntert, P., Schwalbe, H., Vranken, W. F., ... Bonvin, A. M. J. J. (2012). WeNMR: Structural Biology on the Grid. *Journal of Grid Computing*, *10*(4), 743–767.

## FIGURES

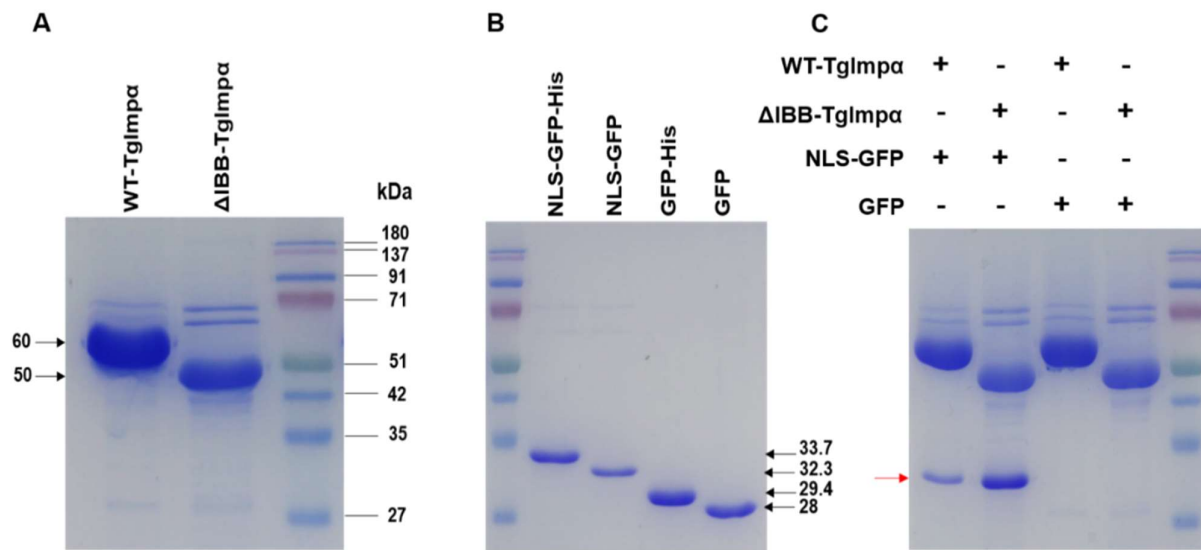

Figure 1: **Binding assay using Ni-NTA beads shows that *T. gondii* importin  $\alpha$  demonstrates auto-inhibition.** (A) SDS-PAGE analysis of purified bait proteins for the binding assays. The expected sizes of WT-TgImp $\alpha$  and  $\Delta$ IBB-TgImp $\alpha$  are 60 kDa and 50 kDa, respectively. (B) SDS-PAGE analysis of purified prey proteins. The expected sizes of GFP fused PFTGS1-NLS with the His-tag (PFTGS1-NLS-GFP-His) and without His-tag (PFTGS1-NLS-GFP), GFP with the His-tag (GFP-His) and without His-tag (GFP) are 33.7 kDa, 32.3 kDa, 29.4 kDa and 28 kDa, respectively. (C) Gel-based binding assay of the interaction of WT-TgImp $\alpha$  and  $\Delta$ IBB-TgImp $\alpha$  with PFTGS1-NLS-GFP. The red arrow indicates the prey protein, PFTGS1-NLS-GFP. The assay was done in duplicates ( $n = 2$ ). Note that WT-TgImp $\alpha$  indicates the full-length TgImp $\alpha$  protein.

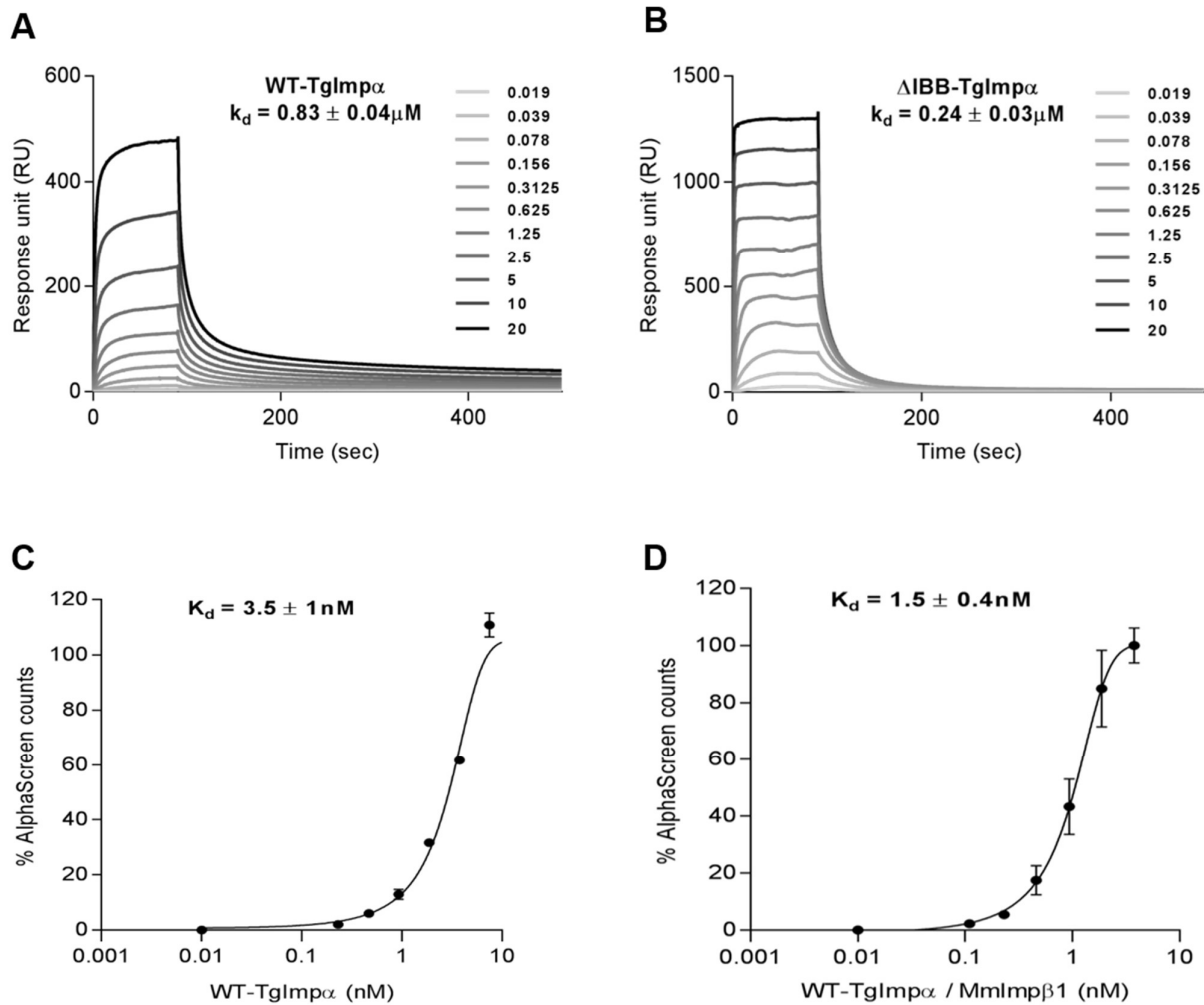

Figure 2: **SPR kinetic analysis and AlphaScreen assay confirm that *T. gondii* importin  $\alpha$  demonstrates auto-inhibition.** SPR kinetic analysis of the interaction of (A) WT-TgImp $\alpha$  and (B)  $\Delta$ IBB-TgImp $\alpha$  with PfTGS1-NLS-GFP. The concentration range mentioned is  $\mu\text{M}$ . AlphaScreen binding assay of (C) WT-TgImp $\alpha$  alone and (D) WT-TgImp $\alpha$ /MmImp $\beta$ 1 dimer with SV40 T-ag-NLS-GFP. All results represent the mean  $\pm$  SD ( $n = 3$ ) for  $K_d$  values measured. Note that WT-TgImp $\alpha$  indicates the full-length TgImp $\alpha$  protein.



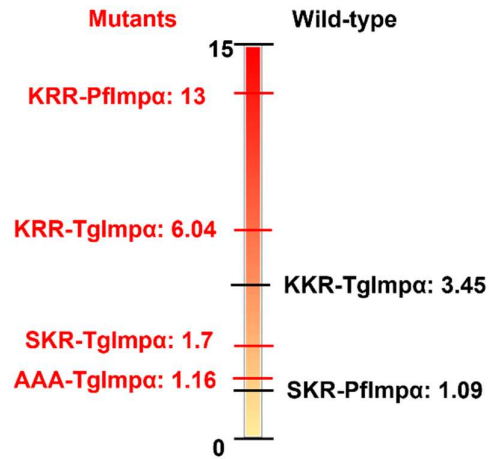

Figure 4: **Comparison of wild-type and third basic cluster mutants of importin  $\alpha$  from different organisms.** Pf: *P. falciparum*, Tg: *T. gondii*. The fold-change values for binding the wild-type or mutant TgImp $\alpha$  proteins to PfTGS1-NLS are compared to  $\Delta$ IBB-TgImp $\alpha$  and depicted in the schematic to allow a direct, visual comparison with wild-type and mutant proteins from *P. falciparum* (Dey & Patankar, 2018). Wild-type proteins are shown in black, while the third basic cluster mutant proteins are shown in red. The residues in the third basic cluster are mentioned with the name of the protein.

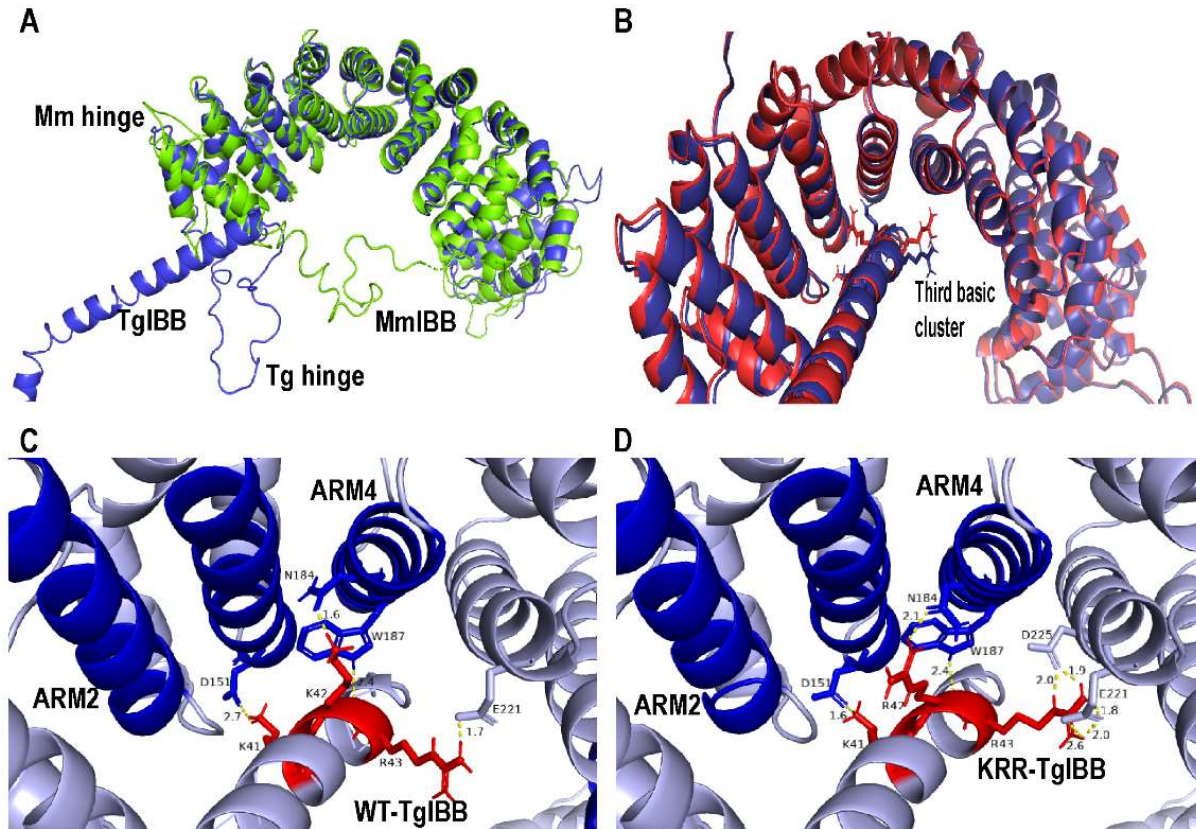

Figure 5. *Ab initio* models of the interaction at the IBB/ARM interface of TgImp $\alpha$  (A) Predicted models of MmImp $\alpha$ 2 (green) and TgImp $\alpha$  (blue) superimposed to show the similarity between the two predicted models at the ARM repeats but not at the IBB domain. A difference in the length of the hinge motif can be distinctly seen. (B) Superimposing predicted  $\Delta$ IBB-TgImp $\alpha$  docked with predicted TgIBB (blue) and KRR-TgIBB (red), their third basic residue cluster and IBB are superimposed. Measurements of the polar bond distances at the IBB/ARM interface of the models when (C) TgIBB and (D) KRR-TgIBB are docked at  $\Delta$ IBB-TgImp $\alpha$ , NLS-binding site (dark blue) and third basic cluster (dark red) are shown. Note that TgIBB denotes the WT-TgIBB protein without any mutations.



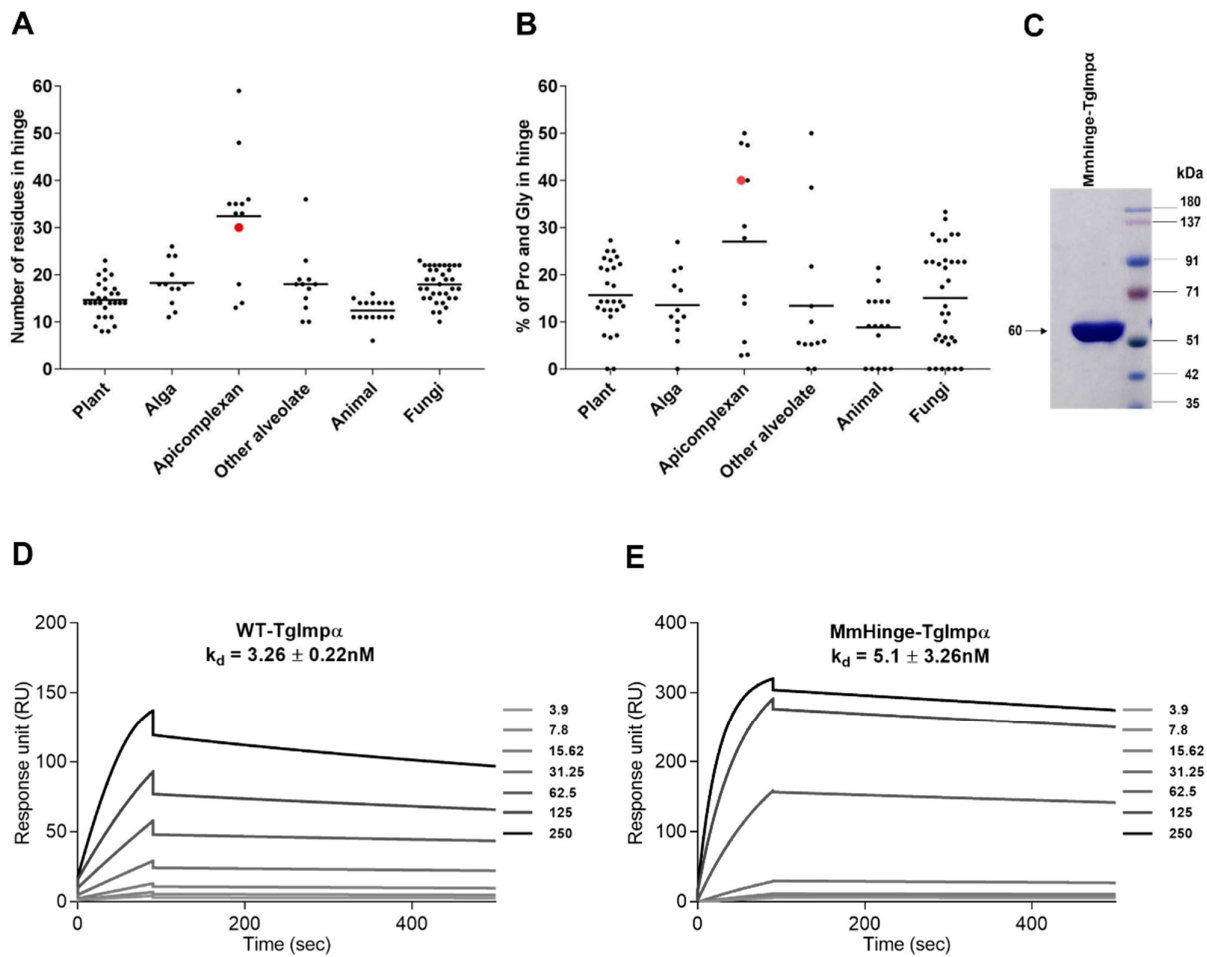

**Figure 6. Hinge motif in importin  $\alpha$  from different phyla varies in length and composition yet does not contribute to auto-inhibition of TgImp $\alpha$ .** (A) Every dot is an importin  $\alpha$  protein for the respective number of residues in the hinge motif with the mean value of the respective phyla. A significant difference is observed amongst groups,  $P < 0.0001$  by ANOVA test. (B) Every dot is an importin  $\alpha$  for the composition of proline and glycine residues in the hinge (values in percentage of the hinge length). A significant difference is observed amongst groups,  $P < 0.002$  by ANOVA test. The dataset includes 73 proteins, the same as the phylogenetic analyses (see methods section). Highlighted is the hinge of TgImp $\alpha$  in red. (C) SDS-PAGE of purified MmHinge-TgImp $\alpha$  protein with an expected size of 60 kDa. SPR kinetic analysis of the interaction of (D) WT-TgImp $\alpha$  and (E) MmHinge-TgImp $\alpha$  with PFTGS1-NLS-GFP. All results represent the mean  $\pm$  SD ( $n = 3$ ) for  $K_d$  values measured. The concentration range mentioned is in nM.

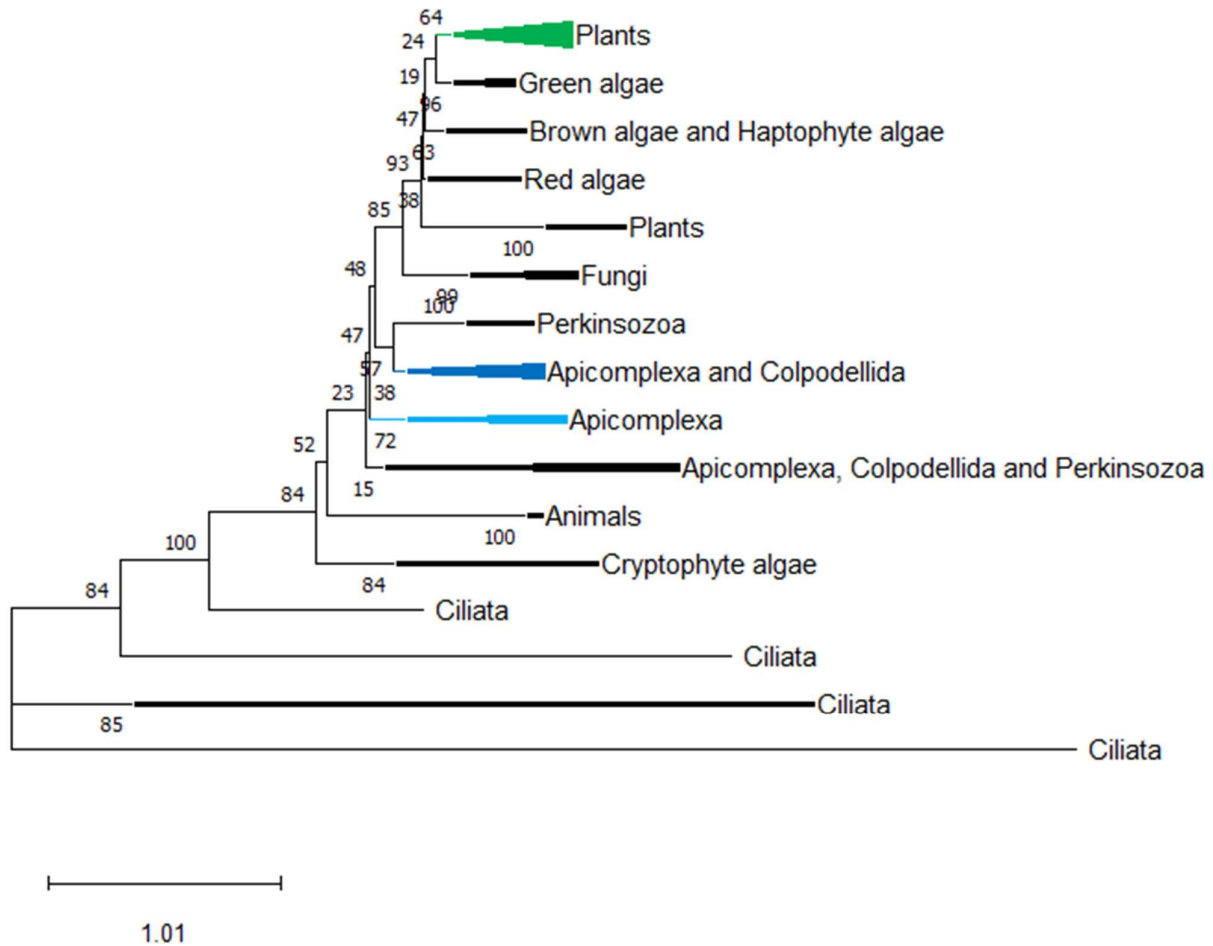

Figure 7. **Importin  $\alpha$  of apicomplexans *P. falciparum* and *T. gondii* and plant *A. thaliana* shows no evolutionary relatedness.** Maximum likelihood phylogeny of the importin  $\alpha$  proteins. The highlighted branches are AtImp $\alpha$ 1 (green), TgImp $\alpha$  (blue) and PfImp $\alpha$  (cyan). The other sequences are from *Theileria*, *Babesia*, *Cryptosporidium*, *Neospora*, *Besnoitia*, *Cystoisospora*, *Cyclospora*, *Gregarina*, *Hepatocystis* and *Eimeria* (apicomplexan); *Chlamydomonas*, *Volvox*, *Chlorella* and *Auxenochlorella* (green alga); *Ectocarpus* (brown alga); *Emiliania* (haptophyte alga); *Galdieria*, *Porphyra* and *Gracilariopsis* (red alga); *Saccharomyces*, *Schizosaccharomyces* and *Neurospora* (fungi); *Perkinsus* (perkinsozoan); *Vitrella* (colpodellid); *Guillardia*, *Hemiselmis* and *Chroomonas* (cryptophyte alga); *Paramecium* and *Tetrahymena* (ciliate); *Homo* and *Mus* (animal). The apicomplexans and ciliates importin  $\alpha$  branched into multiple clades. The dataset used for the phylogenetic analysis contained 73 importin  $\alpha$  proteins. The branching pattern was collapsed to show representative clades and not individual organisms.

## **TABLES**

| <b>MmImp<math>\alpha</math>2 (PDB: 1IAL)</b> |                                                | <b>WT-TgIBB and <math>\Delta</math>IBB-TgImp<math>\alpha</math></b> |                      | <b>KRR-TgIBB and <math>\Delta</math>IBB-TgImp<math>\alpha</math></b> |                             |
|----------------------------------------------|------------------------------------------------|---------------------------------------------------------------------|----------------------|----------------------------------------------------------------------|-----------------------------|
| <b>IBB</b>                                   | <b>ARM</b>                                     | <b>IBB</b>                                                          | <b>ARM</b>           | <b>IBB</b>                                                           | <b>ARM</b>                  |
| K42                                          |                                                | H34                                                                 | R61 (2.8), S64 (2.8) | H34                                                                  |                             |
| K43                                          |                                                | R35                                                                 |                      | R35                                                                  |                             |
| D44                                          | W273 (hy), R315 (hy)                           | E36                                                                 |                      | E36                                                                  |                             |
| E45                                          | W273 (hy)                                      | Q37                                                                 | S64 (2.5)            | Q37                                                                  | S64 (2.2)                   |
| Q46                                          | S234 (2.8), D270 (2.5), Y277 (2.8), R238 (2.7) | N38                                                                 |                      | N38                                                                  | W101 (2.1), N105 (2.1)      |
| M47                                          | W231 (3.1)                                     | L39                                                                 |                      | L39                                                                  |                             |
| L48                                          | N235 (3.2)                                     | A40                                                                 |                      | A40                                                                  |                             |
| <u>K49</u>                                   | G150 (3.0), T151 (3.3), T155 (2.8), D192 (2.7) | <u>K41</u>                                                          | D151 (2.7)           | <u>K41</u>                                                           |                             |
| <u>R50</u>                                   | W184 (2.9), N188 (2.8, 2.9), N228 (2.9, 3.0)   | <u>K42</u>                                                          | W187 (2.4)           | <u>R42</u>                                                           | N184 (2.1), W187 (2.4)      |
| <u>R51</u>                                   | L104 (3.0), R106 (3.0, 3.0)                    | <u>R43</u>                                                          |                      | <u>R43</u>                                                           | E221 (2.0, 2.6), D225 (2.0) |
| N52                                          | S105 (2.9), W142 (3.0), N146 (2.8, 2.9)        | A44                                                                 |                      | A44                                                                  |                             |
| V53                                          |                                                | E45                                                                 | G150 (2.8)           | E45                                                                  | N147 (2.1)                  |
| S54                                          |                                                | A46                                                                 |                      | A46                                                                  |                             |
| S55                                          |                                                | L47                                                                 |                      | L47                                                                  |                             |
| F56                                          |                                                | D48                                                                 | N191 (2.6)           | D48                                                                  | R156 (2.0), R194 (2.3)      |

Table 1. **Polar interactions formed at the interface between the IBB domain and the ARM repeats.** Mm: *M. musculus*, Tg: *T. gondii*. The polar bond distances in Angstroms (Å), hy (hydrophobic) are in brackets with the residue number. The polar bond distances for MmImp $\alpha$ 2 are from the PDB: 1IAL, and for TgImp $\alpha$ , wild-type and mutant IBB are from the docking analyses. Note that TgIBB denotes the WT-TgImp $\alpha$  IBB domain. Underlined are the third basic cluster residues.

| Organism                | Third cluster | NLS            | Importin protein              | Dissociation constant ( $K_d$ ) | Fold-change | Technique                   | Reference               |
|-------------------------|---------------|----------------|-------------------------------|---------------------------------|-------------|-----------------------------|-------------------------|
| <b>Mono-partite NLS</b> |               |                |                               |                                 |             |                             |                         |
| <i>H. sapiens</i>       | KRR           | SV40 T-ag      | FL-HsImp $\alpha$ 1           | $102.1 \pm 11.0 \mu\text{M}$    | 18.56       | ITC                         | (Miyatake et al., 2015) |
|                         |               |                | $\Delta$ IBB-HsImp $\alpha$ 1 | $5.5 \pm 2.0 \mu\text{M}$       |             |                             |                         |
| <i>S. cerevisiae</i>    | KRR           | SV40 T-ag      | FL-ScImp $\alpha$             | $500 \pm 5 \text{ nM}$          | 27.77       | Fluorescence depolarization | (Harreman et al., 2003) |
|                         |               |                | + ScImp $\beta$ *             | $18 \pm 4 \text{ nM}$           |             |                             |                         |
| <i>S. cerevisiae</i>    | KRR           | SV40 T-ag      | FL-ScImp $\alpha$             | $2.0 \pm 0.12 \text{ nM}$       | 0.95        | ELISA                       | (Hu & Jans, 1999)       |
|                         |               |                | + ScImp $\beta$ *             | $2.1 \pm 0.3 \text{ nM}$        |             |                             |                         |
| <i>M. musculus</i>      | KRR           | SV40 T-ag      | FL-MmImp $\alpha$ 2           | $5.5 \pm 0.4 \text{ nM}$        | 2.03        |                             |                         |
|                         |               |                | + MmImp $\beta$ *             | $2.7 \pm 0.1 \text{ nM}$        |             |                             |                         |
| <i>M. musculus</i>      | KRR           | SV40 T-ag      | FL-MmImp $\alpha$ 2           | $24.2 \pm 6.8 \text{ nM}$       | 7.8         | ELISA                       | (Hübner et al., 1999)   |
|                         |               |                | + MmImp $\beta$ *             | $3.1 \pm 0.3 \text{ nM}$        |             |                             |                         |
| <i>A. thaliana</i>      | KKR           | SV40 T-ag      | FL-AtImp $\alpha$ 1           | $8.3 \pm 1.1 \text{ nM}$        | 0.93        |                             |                         |
|                         |               |                | + MmImp $\beta$ *             | $8.9 \pm 1.3 \text{ nM}$        |             |                             |                         |
| <i>O. sativa</i>        | KKR           | SV40 T-ag      | FL-OsImp $\alpha$ 1           | $1730 \pm 150 \text{ nM}$       | 432.5       | Microtitre plate binding    | (Chang et al., 2012)    |
|                         |               |                | $\Delta$ IBB-OsImp $\alpha$ 1 | $4 \pm 2 \text{ nM}$            |             |                             |                         |
| <i>T. gondii</i>        | KKR           | SV40 T-ag      | FL-TgImp $\alpha$             | $3.5 \pm 1 \text{ nM}$          | 2.33        | AlphaScreen                 | This report             |
|                         |               |                | + MmImp $\beta$ *             | $1.5 \pm 0.4 \text{ nM}$        |             |                             |                         |
| <b>Bi-partite NLS</b>   |               |                |                               |                                 |             |                             |                         |
| <i>P. falciparum</i>    | SKR           | PFTGS1         | FL-PfImp $\alpha$             | $84.94 \pm 5.31 \text{ nM}$     | 1.09        | SPR                         | (Dey & Patankar, 2018)  |
|                         |               |                | $\Delta$ IBB-PfImp $\alpha$   | $77.49 \pm 10.22 \text{ nM}$    |             |                             |                         |
| <i>M. musculus</i>      | KRR           | Retinoblastoma | FL-MmImp $\alpha$ 2           | $153 \pm 38 \text{ nM}$         | 3.98        | ELISA                       | (Hu et al., 2005)       |
|                         |               |                | + MmImp $\beta$ *             | $38.4 \pm 4.2 \text{ nM}$       |             |                             |                         |
| <i>S. cerevisiae</i>    | KRR           | Retinoblastoma | FL-ScImp $\alpha$             | $22.2 \pm 3.9 \text{ nM}$       | 2.84        |                             |                         |
|                         |               |                | + ScImp $\beta$ *             | $7.8 \pm 0.5 \text{ nM}$        |             |                             |                         |
| <i>T. gondii</i>        | KKR           | PFTGS1         | FL-TgImp $\alpha$             | $0.83 \pm 0.04 \mu\text{M}$     | 3.45        | SPR                         | This report             |
|                         |               |                | $\Delta$ IBB-TgImp $\alpha$   | $0.24 \pm 0.03 \mu\text{M}$     |             |                             |                         |

Table 2. **Auto-inhibition of importin  $\alpha$  proteins from different organisms.** The sequence of the third basic cluster in the IBB domain, the NLS used in binding assays and the dissociation constants of the importin  $\alpha$  from different organisms are shown. The fold-change between the  $K_d$  of the full-length (FL) importin  $\alpha$  and the protein that lacks auto-inhibition, either due to IBB domain deletion ( $\Delta$ IBB) or due to the addition of importin  $\beta$  (shown with an asterisk), is calculated and serves as a measure of the strength of auto-inhibition. The experimental techniques and types of NLSs are mentioned. ITC: Isothermal calorimetry; ELISA: Enzyme-linked immunosorbent assay; SPR: Surface plasmon resonance.
